# Supplementary material for: Assessment of Maturity of Plum Samples Using Fourier Transform Near-Infrared Technique Combined with Chemometric Methods
Source: MDPI journal article supplement (doi:10.3390/foods12163059), 2023-08-15
Supplement: s1 [file s1]

S1 Examination of reference data - Tukey (HSD) and Dunett (two sided) test/ Analysis of the differences between the categories with a confidence interval of 95%

### Dry matter – DM

Summary of all pairwise comparisons for DM (Tukey (HSD)):

| Category | LS means(DM) | Groups |
|----------|--------------|--------|
| Immature | 21,702       | A      |
| Mature   | 18,712       | B      |

Summary (LS means) - DM

|               | DM                  |
|---------------|---------------------|
| Immature      | 21,702 <sup>a</sup> |
| Mature        | 18,712 <sup>b</sup> |
| Pr > F(Model) | < 0,0001            |
| Significant   | Yes                 |

### Titrateable acidity TA

Summary of all pairwise comparisons for TA (Tukey (HSD)):

| Category | LS means(TA) | Groups |
|----------|--------------|--------|
| Immature | 1,520        | A      |
| Mature   | 0,891        | B      |

Summary (LS means) - TA

|               | TA                 |
|---------------|--------------------|
| Immature      | 1,520 <sup>a</sup> |
| Mature        | 0,891 <sup>b</sup> |
| Pr > F(Model) | < 0,0001           |
| Significant   | Yes                |

### Total soluble solid – TSS

Summary of all pairwise comparisons for TSS (Tukey (HSD)):

| Category | LS means(TSS) | Groups |
|----------|---------------|--------|
| Mature   | 14,074        | A      |
| Immature | 8,742         | B      |

Summary (LS means) - TSS

|               | TSS                 |
|---------------|---------------------|
| 1             | 14,074 <sup>a</sup> |
| 2             | 8,742 <sup>b</sup>  |
| Pr > F(Model) | < 0,0001            |
| Significant   | Yes                 |

**Maturity index MI=TSS/TA**

| Category | LS means(MI) | Groups |
|----------|--------------|--------|
| Mature   | 16,383       | A      |
| Immature | 5,713        | B      |

**Summary (LS means) - MI**

|               | MI                  |
|---------------|---------------------|
| Mature        | 16,383 <sup>a</sup> |
| Immature      | 5,713 <sup>b</sup>  |
| Pr > F(Model) | < 0,0001            |
| Significant   | Yes                 |
